critically ill patients. Theoretically, our data also suggest that when therapy for low  $[Ca^{++}]$  is initiated during low-output states, intravenous  $CaCl_2$  may have to be administered at rates as high as 1.5 mg/kg/min. This recommendation cannot be justified without close monitoring of  $[Ca^{++}]$  since absence of a constant relationship between changes in  $[Ca^{++}]$  and  $[Ca]$  is clearly demonstrated by the present report.

Our observations suggest, however, that improvement of hemodynamic function by isoproterenol infusion was instrumental in the restoration of normal  $[Ca^{++}]$ , since  $[Ca^{++}]$  rose to normal before the effectiveness of  $CaCl_2$  therapy was apparent.

Finally, increased neuromuscular irritability was not apparent in our patients despite the remarkably low  $[Ca^{++}]$ 's. The reason for its absence is unclear.

### References

- Bunker JP: Metabolic effects of blood transfusion. *ANESTHESIOLOGY* 27:446-453, 1966
- Hinkle JE, Cooperman LH: Serum ionized calcium changes following citrated blood transfusion in anaesthetized man. *Br J Anaesth* 43: 1108-1112, 1971
- Van de Water JM, Phillips PA, Linton LA, et al: Muscle surface pH monitoring. Evaluation and clinical application. *Arch Surg* 104:799-805, 1972
- Moore EW: Ionized calcium in normal serum, ultrafiltrates and whole blood determined by ion-exchange electrodes. *J Clin Invest* 49:318-330, 1970
- Radde IC, Hoffken B, Parkinson DK, et al: Practical aspects of a measurement technique for calcium ion activity in plasma. *Clin Chem* 17:1002-1006, 1971
- Studer O, Knob M, Binswanger U: Kalziumionkonzentration im Serum. *Schweiz Med Wochenschr* 102:305-308, 1972
- Kelman GR, Nunn JF: Nomograms for correction of blood  $P_{O_2}$ ,  $P_{CO_2}$ , pH and base excess for time and temperature. *J Appl Physiol* 21: 1484-1490, 1966
- Bett IM, Frazer GP: A rapid micromethod for determining serum calcium. *Clin Chim Acta* 4:346-356, 1959
- Chen PS, Toribara TY, Warner H: Microdetermination of phosphorus. *Anal Chem* 28: 1756-1759, 1956
- Garner RJ: Colorimetric determination of magnesium in plasma or serum by means of titanous yellow. *Biochem J* 40:828, 1946
- Sunderman FW: A rapid method for estimating serum proteins. *J Biol Chem* 153:139-144, 1944
- Swan HJC, Ganz W, Forrester J, et al: Catheterization of the heart in man with use of a flow-directed balloon-tipped catheter. *N Engl J Med* 283:447-451, 1970
- Abel RM, Beck CH, Abbott WM, et al: Improved survival from acute renal failure after treatment with intravenous essential amino acid and glucose. *N Engl J Med* 288:695-699, 1973
- Barry GD: Plasma calcium concentration changes in hemorrhagic shock. *Am J Physiol* 220:874-879, 1971
- Fischer JA, Blum JW, Binswanger U: Acute parathyroid hormone response to pinephrine *in vitro*. *J Clin Invest* 52:2434-2440, 1973
- Drezner M, Neelon FA, Lebovitz HE: Pseudohypoparathyroidism type II: A possible defect in the reception of the cyclic AMP signal. *N Engl J Med* 289:1056-1060, 1973
- Editorial: Disorders of magnesium metabolism in infancy. *Br Med J* 4:373-374, 1973
- Suh SM, Tashjian AM, Matsuo N, et al: Pathogenesis of hypocalcemia in primary hypomagnesemia: Normal end-organ responsiveness to PTH: impaired parathyroid gland function. *J Clin Invest* 52:153-160, 1973
- Van Leeuwen AM, Van Eps LWS, Boen ST, et al: Hypotension accompanying ECG changes in two uremic patients with severe hypocalcemia. *Am Heart J* 61:264-271, 1961
- Troughton O, Singh SP: Heart failure and neonatal hypocalcemia. *Br Med J* 4:76-79, 1972

### Erratum

An error appeared in the title of a recent article, "Humoral immunity to a metabolite of halothane, fluroxene, and enflurane" (*ANESTHESIOLOGY* 42:612-616, 1975). "Enflurane" should read "isoflurane," since the former does not metabolize to form trifluoroacetate. The error also appears in lines 2 and 10 of the abstract.

Downloaded from http://ajph.aphspublishers.org/ by guest on 20 April 2024
